# Supplementary material
Source: MDPI journal article supplement (https://www.mdpi.com/1424-8247/16/4/532)
Supplement: s1 [file s1]

| MicroRNA-502-3p | Predicted target gene | 3P-seq tags | Cumulative score | Total context++ score |
|-----------------|-----------------------|-------------|------------------|-----------------------|
| hsa-miR-501-3p  | TMEM213               | 5           | -0.84            | -0.84                 |
| hsa-miR-501-3p  | RPRD1B                | 1140        | -0.78            | -0.78                 |
| hsa-miR-501-3p  | TMSB15A               | 14          | -0.77            | -0.77                 |
| hsa-miR-502-3p  | KCTD9                 | 575         | -0.72            | -0.72                 |
| hsa-miR-501-3p  | TMEM170B              | 489         | -0.72            | -0.82                 |
| hsa-miR-501-3p  | ZNF488                | 61          | -0.65            | -0.74                 |
| hsa-miR-501-3p  | MYNN                  | 289         | -0.64            | -0.74                 |
| hsa-miR-501-3p  | SUMO1                 | 180         | -0.6             | -0.67                 |
| hsa-miR-501-3p  | CLEC4D                | 5           | -0.57            | -0.57                 |
| hsa-miR-501-3p  | SLC26A6               | 529         | -0.55            | -0.55                 |
| hsa-miR-501-3p  | ADAMTS3               | 5           | -0.55            | -0.55                 |
| hsa-miR-501-3p  | SSX1                  | 5           | -0.55            | -0.55                 |
| hsa-miR-501-3p  | SAMD12                | 57          | -0.54            | -0.54                 |
| hsa-miR-501-3p  | SSX4                  | 5           | -0.53            | -0.53                 |
| hsa-miR-501-3p  | B4GALT5               | 1000        | -0.53            | -0.54                 |
| hsa-miR-501-3p  | SSX7                  | 5           | -0.53            | -0.53                 |
| hsa-miR-501-3p  | SSX4B                 | 5           | -0.53            | -0.53                 |
| hsa-miR-501-3p  | ATP1B1                | 656         | -0.53            | -0.53                 |
| hsa-miR-501-3p  | CHMP1B                | 3248        | -0.53            | -0.53                 |
| hsa-miR-501-3p  | SSX3                  | 5           | -0.53            | -0.53                 |
| hsa-miR-501-3p  | MDP1                  | 1268        | -0.53            | -0.53                 |
| hsa-miR-501-3p  | PLK2                  | 689         | -0.52            | -0.52                 |
| hsa-miR-501-3p  | SEC63                 | 3181        | -0.52            | -0.9                  |
| hsa-miR-501-3p  | LITAF                 | 11008       | -0.52            | -0.52                 |
| hsa-miR-501-3p  | PP13439               | 289         | -0.51            | -0.51                 |
| hsa-miR-502-3p  | RNF144A               | 124         | -0.51            | -0.51                 |
| hsa-miR-501-3p  | ADIPOQ                | 5           | -0.51            | -0.51                 |
| hsa-miR-501-3p  | CCR1                  | 10          | -0.51            | -0.51                 |
| hsa-miR-501-3p  | TBCC                  | 587         | -0.5             | -0.57                 |
| hsa-miR-501-3p  | CLN5                  | 184         | -0.5             | -0.5                  |
| hsa-miR-501-3p  | TM6SF1                | 211         | -0.5             | -0.51                 |
| hsa-miR-501-3p  | CYP27C1               | 5           | -0.49            | -0.49                 |
| hsa-miR-501-3p  | SSX2B                 | 5           | -0.49            | -0.49                 |
| hsa-miR-501-3p  | SSX2                  | 5           | -0.49            | -0.49                 |
| hsa-miR-501-3p  | LDHAL6A               | 5           | -0.48            | -0.48                 |
| hsa-miR-501-3p  | ASPH                  | 3013        | -0.48            | -0.48                 |
| hsa-miR-501-3p  | DCLK3                 | 5           | -0.47            | -0.47                 |
| hsa-miR-501-3p  | RASSF5                | 27          | -0.47            | -0.49                 |
| hsa-miR-501-3p  | PMAIP1                | 12503       | -0.47            | -0.47                 |
| hsa-miR-501-3p  | CLIC4                 | 226         | -0.47            | -0.47                 |
| hsa-miR-501-3p  | ZIM2                  | 5           | -0.47            | -0.47                 |
| hsa-miR-501-3p  | JDP2                  | 110         | -0.47            | -0.77                 |
| hsa-miR-501-3p  | MPZL3                 | 59          | -0.47            | -0.47                 |
| hsa-miR-501-3p  | COL10A1               | 5           | -0.47            | -0.47                 |
| hsa-miR-501-3p  | PNLIPRP1              | 5           | -0.46            | -0.46                 |
| hsa-miR-501-3p  | SEPSECS               | 279         | -0.46            | -0.58                 |
| hsa-miR-501-3p  | DAPK1                 | 92          | -0.46            | -0.46                 |

|                |              |      |       |       |
|----------------|--------------|------|-------|-------|
| hsa-miR-501-3p | OR10D3       | 5    | -0.46 | -0.46 |
| hsa-miR-501-3p | MARCKS       | 188  | -0.46 | -0.48 |
| hsa-miR-501-3p | TCEAL4       | 937  | -0.46 | -0.46 |
| hsa-miR-501-3p | CDK6         | 1116 | -0.46 | -0.52 |
| hsa-miR-501-3p | ITK          | 5    | -0.46 | -0.46 |
| hsa-miR-501-3p | NAP1L5       | 28   | -0.45 | -0.66 |
| hsa-miR-501-3p | PPP3CC       | 254  | -0.45 | -0.46 |
| hsa-miR-501-3p | ATXN1        | 106  | -0.45 | -0.54 |
| hsa-miR-501-3p | RBMS1        | 90   | -0.45 | -0.45 |
| hsa-miR-501-3p | HDHD2        | 501  | -0.45 | -0.49 |
| hsa-miR-501-3p | YIPF7        | 5    | -0.45 | -0.45 |
| hsa-miR-501-3p | TUSC1        | 987  | -0.45 | -0.45 |
| hsa-miR-501-3p | MRPS27       | 1137 | -0.44 | -0.45 |
| hsa-miR-501-3p | C8orf33      | 359  | -0.44 | -0.47 |
| hsa-miR-501-3p | DCAF4L2      | 10   | -0.44 | -0.44 |
| hsa-miR-502-3p | AL953854.2   | 5    | -0.44 | -0.44 |
| hsa-miR-501-3p | PHOX2B       | 5    | -0.44 | -0.44 |
| hsa-miR-501-3p | PROM2        | 18   | -0.44 | -0.44 |
| hsa-miR-501-3p | RP1-228P16.5 | 5    | -0.43 | -0.43 |
| hsa-miR-502-3p | SLC25A13     | 8    | -0.43 | -0.43 |
| hsa-miR-501-3p | TSHZ3        | 81   | -0.43 | -0.43 |
| hsa-miR-501-3p | UBE2H        | 855  | -0.43 | -0.44 |
| hsa-miR-501-3p | OLFM4        | 5    | -0.43 | -0.43 |
| hsa-miR-501-3p | LIN7C        | 1701 | -0.43 | -0.47 |
| hsa-miR-501-3p | COL12A1      | 482  | -0.42 | -0.42 |
| hsa-miR-501-3p | ADAP2        | 16   | -0.42 | -0.44 |
| hsa-miR-501-3p | BHMT2        | 297  | -0.42 | -0.53 |
| hsa-miR-501-3p | FCGR1A       | 5    | -0.42 | -0.42 |
| hsa-miR-501-3p | CCDC3        | 16   | -0.42 | -0.42 |
| hsa-miR-501-3p | TIPRL        | 569  | -0.42 | -0.52 |
| hsa-miR-501-3p | TARDBP       | 410  | -0.41 | -0.43 |
| hsa-miR-501-3p | MYCN         | 73   | -0.41 | -0.45 |
| hsa-miR-501-3p | DCUN1D5      | 1486 | -0.41 | -0.51 |
| hsa-miR-501-3p | ARPP21       | 5    | -0.41 | -0.41 |
| hsa-miR-502-3p | ISCA1        | 5    | -0.4  | -0.4  |
| hsa-miR-502-3p | GPR63        | 5    | -0.4  | -0.4  |
| hsa-miR-501-3p | AADACL3      | 5    | -0.4  | -0.4  |
| hsa-miR-501-3p | COX17        | 40   | -0.39 | -0.69 |
| hsa-miR-501-3p | HOXD10       | 182  | -0.39 | -0.39 |
| hsa-miR-501-3p | LMX1A        | 5    | -0.39 | -0.39 |
| hsa-miR-501-3p | SRSF3        | 2593 | -0.39 | -0.48 |
| hsa-miR-501-3p | MRPL35       | 860  | -0.39 | -0.4  |
| hsa-miR-501-3p | WDR3         | 1166 | -0.39 | -0.59 |
| hsa-miR-501-3p | RAI2         | 46   | -0.39 | -0.39 |
| hsa-miR-501-3p | ZEB2         | 48   | -0.39 | -0.39 |
| hsa-miR-502-3p | SLA2         | 5    | -0.39 | -0.39 |
| hsa-miR-501-3p | SVOPL        | 5    | -0.38 | -0.38 |
| hsa-miR-501-3p | DNAJB6       | 420  | -0.38 | -0.38 |

|                |        |    |       |       |
|----------------|--------|----|-------|-------|
| hsa-miR-501-3p | TTLL6  | 5  | -0.38 | -0.38 |
| hsa-miR-501-3p | ERMN   | 5  | -0.38 | -0.38 |
| hsa-miR-501-3p | CRISP2 | 5  | -0.38 | -0.38 |
| hsa-miR-501-3p | APAF1  | 23 | -0.38 | -0.46 |
| hsa-miR-501-3p | AURKB  | 57 | -0.38 | -0.45 |
